# Supplementary material for: Enhanced electromechanical performance of PSZT–PMS–PFW through morphotropic phase boundary design and defect engineering
Source: Royal Society of Chemistry journal article supplement (doi:10.1039/d3tc01433a), 2023-01-01
Supplement: d3tc01433a1.pdf [file d3tc01433a1.pdf]

Supplementary Information

Enhanced electromechanical performance of PSZT-PMS-PFW through morphotropic  
phase boundary design and defect engineering

Qiao et al

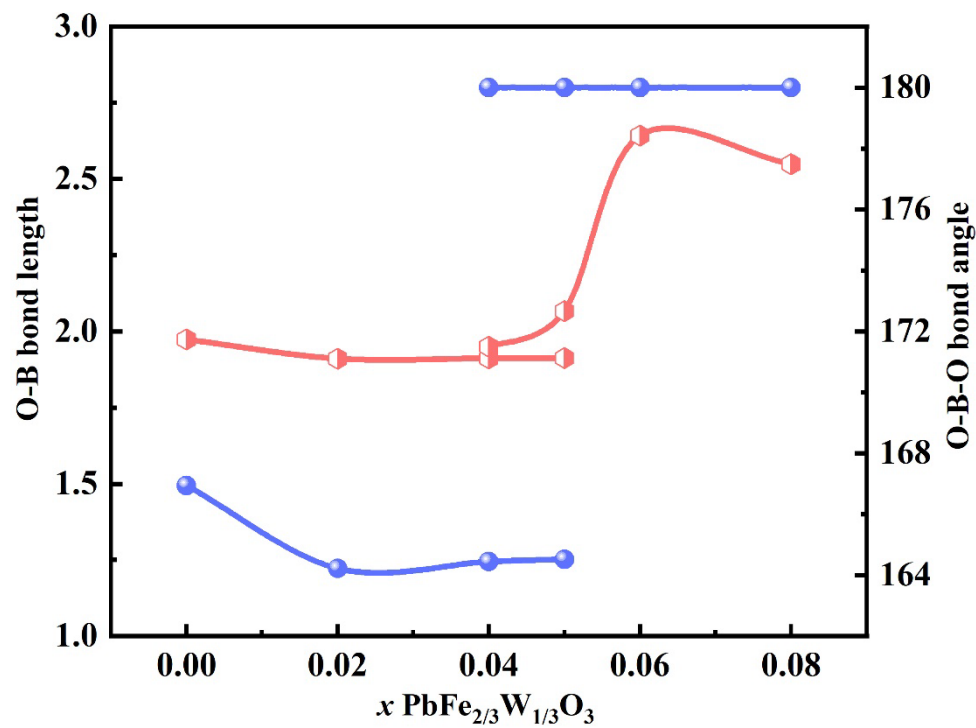

Fig. S1 The O-B-O bond angle and the O-B bond length of PSZT-PMS- $x$ PFW ceramics.

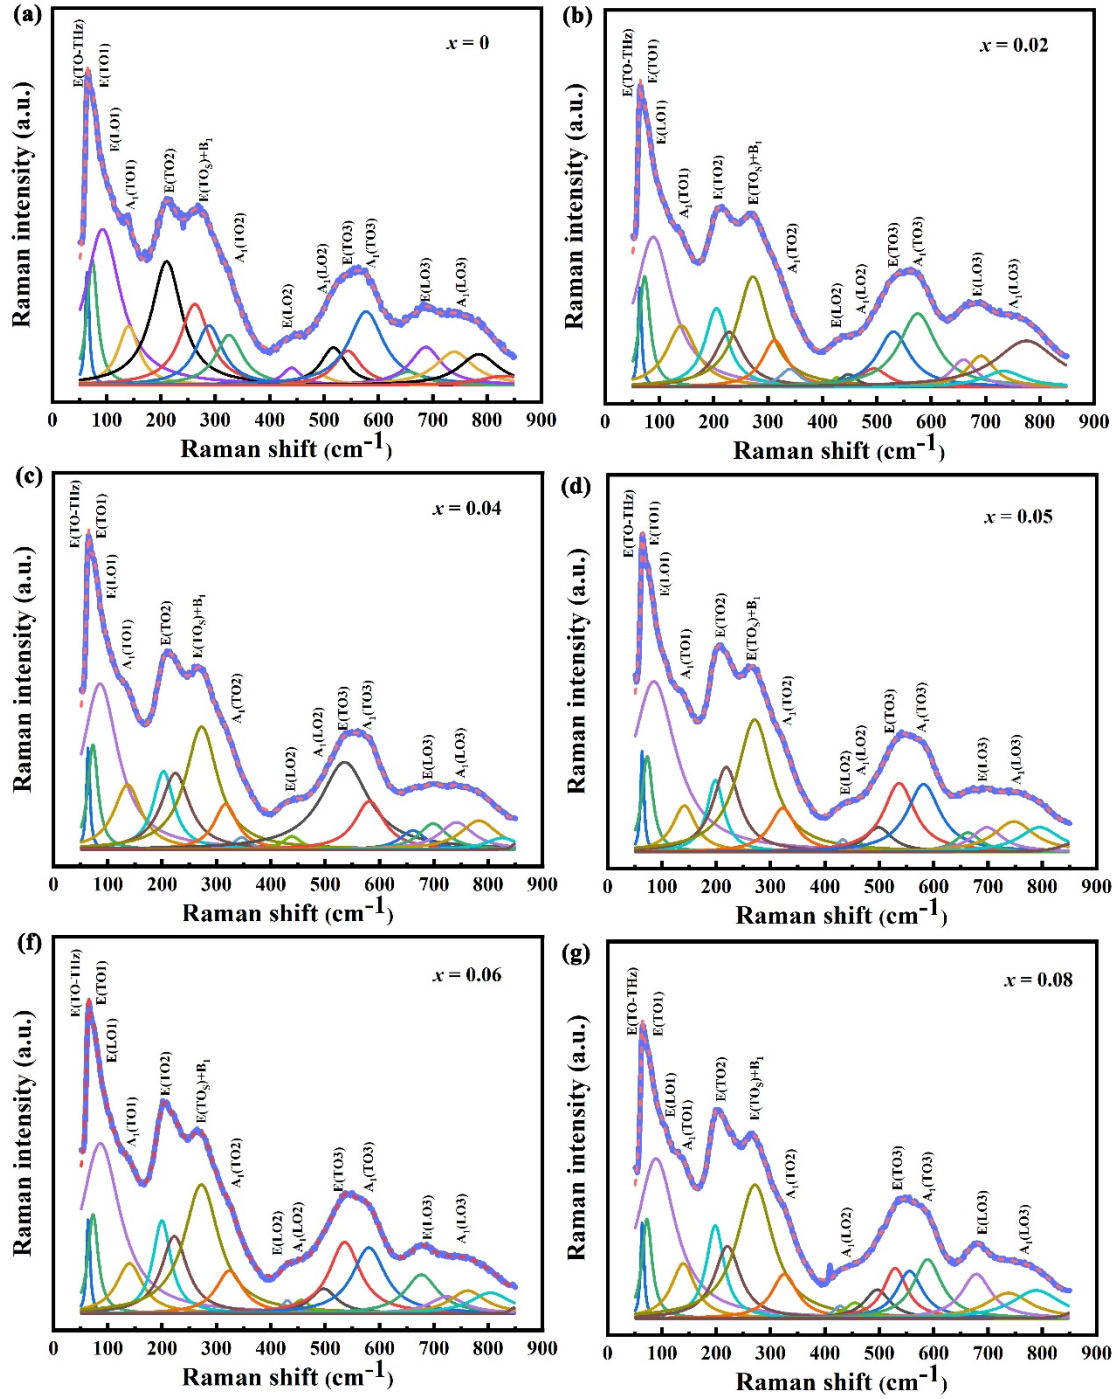

Fig. S2 The composition dependence of raman spectra together with a curve fit at room temperature for PSZT-PMS-xPFW ceramics.

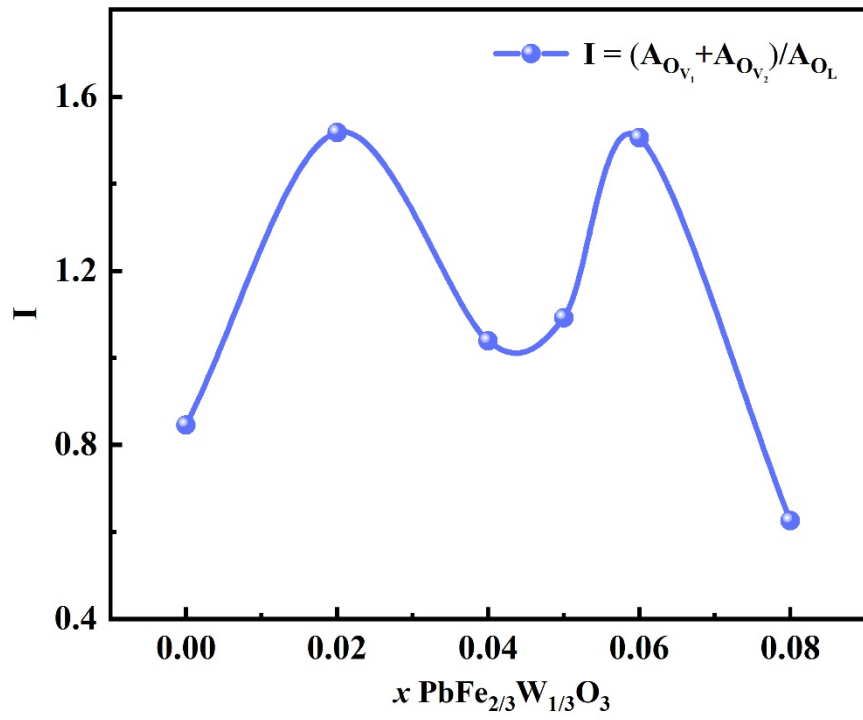

Fig. S3. The peak area ratio oxygen vacancy (OV) / oxygen atom (OL) of PSZT-PMS- $x$ PFW ceramics
